# Supplementary material for: Stimulation of hypothalamic oxytocin neurons suppresses colorectal cancer progression in mice
Source: eLife. 2021 Sep 16;10:e67535. doi: 10.7554/eLife.67535 (PMC8536257; doi:10.7554/eLife.67535)
Supplement: Figure 1—source data 1. [file elife-67535-fig1-data1.xlsx]

## Sheet:  Figure_1C
	OxtCre	OxtCre;DTA
	54	4
	41	1
	34	3
	64	3

## Sheet:  Figure_1D
	OxtCre	OxtCre;DTA
	7	16
	6	10
	6	16
	5	8
	9	12
	9

## Sheet:  Figure_1E
	OxtCre	OxtCre;DTA
	1.49	2.1
	1.4	1.8
	1.47	2.42
	1.9	1.65
	1.74	1.88
	1.73

## Sheet:  Figure_1F
	OxtCre	OxtCre;DTA		(x1000)
	4.57911	7.88855
	5.41768	8.58962
	5.02904	6.78924
	5.70354	5.28799

## Sheet:  Figure_1G
	OxtCre	OxtCre;DTA		(x100)
	1.2287	0.374767
	1.63877	0.80505
	1.19314	0.733823
	1.38291	0.42178

## Sheet:  Figure_1J
	Control	hM3Dq
	4.7619	84.2105
	11.1111	84
	10.8696	86.9565
	8.57143	94.4444

## Sheet:  Figure_1K
	Control	hM3Dq
	4	1
	6	3
	8	2
	13	2
	6	7
	4	3

## Sheet:  Figure_1L
	Control	hM3Dq
	1.7	1.2
	1.55	1.67
	1.86	1.5
	1.68	1.65
	1.7	1.29
	1.68	1.33

## Sheet:  Figure_1M
	Control	hM3Dq		(x1000)
	5.36144	3.66431
	5.90274	3.13938
	5.98954	2.7895
	3.69429

## Sheet:  Figure_1N
	Control	hM3Dq		(x100)
	2.24078	5.30826
	0.41825	5.27719
	1.37587	3.08817
