# Supplementary material for: Stimulation of hypothalamic oxytocin neurons suppresses colorectal cancer progression in mice
Source: eLife. 2021 Sep 16;10:e67535. doi: 10.7554/eLife.67535 (PMC8536257; doi:10.7554/eLife.67535)
Supplement: Figure 2—source data 1. [file elife-67535-fig2-data1.xlsx]

## Sheet:  Figure_2B
	aCSF		OTR anta
	Control	hM3Dq	Control	hM3Dq
	3.84615	88	4.34783	86.6667
	9.375	93.3333	5.88235	88.2353
	4.08163	92.5926	4.87805	91.3043
	5.71429	90	5.26316	88.4615
	6.25	93.75	7.69231	81.4815
	2.94118	90.3226	8	92.8571
				94.5946

## Sheet:  Figure_2D
	aCSF		OTR anta
	Control	hM3Dq	Control	hM3Dq
	5	4	10	13
	8	5	8	8
	6	4	8	8
	7	5	10	8
	8	3	7	5
	13	3	9	7
				5

## Sheet:  Figure_2E
	aCSF		OTR anta
	Control	hM3Dq	Control	hM3Dq
	2.16	1.85	2.14	2.33
	1.98	1.46	2.34	2.01
	1.65	1.6	1.83	2.2
	1.91	1.36	2.58	2.13
	2.03	1.53	1.81	1.8
	2.42	1.6	2.4	1.73
				1.66

## Sheet:  Figure_2F
	aCSF		OTR anta
	Control	hM3Dq	Control	hM3Dq
	8.4	8.2	8.5	8.3
	8.8	7.5	8.5	7.9
	7.2	8.2	7.3	8.1
	7.8	7.9	8.1	7.4
	7.9	7.9	8.7	7.8
	7.5	8.1	7.6	8
				7.6

## Sheet:  Figure_2H
	aCSF		OTR anta
	Control	hM3Dq	Control	hM3Dq		(x1000)
	3.374	1.92285	4.49504	4.57385
	5.6867	1.75303	4.84372	3.51342
	3.64924	2.17158	3.94051	3.53819
	5.2798	2.07447	5.47696	4.13441

## Sheet:  Figure_2J
	aCSF		OTR anta
	Control	hM3Dq	Control	hM3Dq		(x100)
	1.1899	3.35578	1.18931	2.51187
	2.12765	2.54874	1.79843	2.09095
	2.17588	6.12305	1.72642	1.40591
	2.40709	5.24726	1.45719	2.81061
