# Supplementary material for: Stimulation of hypothalamic oxytocin neurons suppresses colorectal cancer progression in mice
Source: eLife. 2021 Sep 16;10:e67535. doi: 10.7554/eLife.67535 (PMC8536257; doi:10.7554/eLife.67535)
Supplement: Figure 3—source data 1. [file elife-67535-fig3-data1.xlsx]

## Sheet:  Figure_3B
	Control	hM3Dq
	7.34694	2.12766
	12.9032	0.740741
	3.09735	0.431034
	6.69456	4.13223

## Sheet:  Figure_3F
	Sham		Resection
	OxtCre	OxtCre;DTA	OxtCre	OxtCre;DTA
	7	14	6	9
	10	12	7	8
	5	16	5	9
	7	11	7	6
	5	12	6	12
	6	11	6	7
	8	7	8	7
	6

## Sheet:  Figure_3G
	Sham		Resection
	OxtCre	OxtCre;DTA	OxtCre	OxtCre;DTA
	1.87	2.38	1.5	2.02
	1.82	1.91	1.61	1.61
	1.5	1.89	1.44	1.58
	1.74	2.24	1.59	1.58
	1.56	2.32	1.62	2.04
	1.65	1.85	1.68	1.77
	1.85	1.73	1.59	1.64
	1.58

## Sheet:  Figure_3I
	Sham		Resection
	OxtCre	OxtCre;DTA	OxtCre	OxtCre;DTA		(x1000)
	4.30676	6.15459	3.86087	5.7743
	5.48067	6.70287	4.83974	5.18132
	5.96144	7.49972	4.5176	5.67365
	4.90398	6.85073	5.21254	4.84328
		7.32456	4.97116	5.72989

## Sheet:  Figure_3K
	Sham		Resection
	OxtCre	OxtCre;DTA	OxtCre	OxtCre;DTA		(x100)
	1.46074	0.294748	2.22913	0.897585
	1.81588	0.61428	2.49037	1.33921
	1.42672	0.44258	1.76551	1.42888
	2.2438	0.763861	1.54651	1.54761
	1.20838		1.69817
