# Supplementary material for: Stimulation of hypothalamic oxytocin neurons suppresses colorectal cancer progression in mice
Source: eLife. 2021 Sep 16;10:e67535. doi: 10.7554/eLife.67535 (PMC8536257; doi:10.7554/eLife.67535)
Supplement: Figure 4—source data 1. [file elife-67535-fig4-data1.xlsx]

## Sheet:  Figure_4C
Current (pA)	Control																					Celastrol
0	0	0	0	0	0	0	0	0	0	0	0	0	0	0	0	0	0	0	0	0		0	0	0	0	0	0	0	0	0	0	0	0	0	0	0	0	0	0	0	0
20	0	0	0	0	0	0	0	0	0	0	2	0	0	0	0	0	0	0	0	0		0	0	0	0	0	0	0	0	0	0	0	0	0	0	0	0	0	0	0	0
40	0	0	0	4	0	0	0	0	0	0	7	1	0	1	1	0	0	0	2	0		0	0	3	0	1	0	5	3	1	4	0	7	0	0	0	3	4	1	0	3
60	0	0	0	11	7	0	6	0	5	6	12	8	0	4	7	4	0	1	6	0		5	1	8	3	7	6	11	13	4	10	2	14	2	0	5	11	9	5	1	6
80	2	2	0	15	13	5	16	2	10	12	15	13	1	9	11	8	2	4	9	0		15	3	14	10	13	13	15	22	9	17	16	24	6	0	8	26	14	10	3	11
100	7	4	0	19	19	9	16	9	13	18	19	18	7	14	16	13	5	9	12	0		18	5	19	16	17	20	20	27	13	22	22	29	8	19	12	27	18	13	6	16
120	12	8	0	21	26	11	19	13	18	22	22	22	15	16	19	17	10	13	15	0		21	12	22	21	21	21	24	32	17	26	27	34	14	22	15	30	21	17	11	20
140	17	13	0	25	31	15	23	17	20	24	26	26	21	21	22	19	15	15	18	5		27	20	26	29	25	25	28	35	20	29	30	38	18	38	19	33	26	21	14	21
160	21	15	0	29	34	19	29	20	24	29	29	31	26	24	26	23	18	19	23	14		28	23	30	34	29	30	31	39	23	32	34	44	23	43	21	37	29	24	17	25
180	24	20	0	32	38	21	28	24	26	30	31	35	30	26	29	25	20	22	26	21		30	26	32	39	32	33	34	41	26	34	36	42	25	47	24	40	33	27	20	29
200	28	20	0	34	42	23	33	27	28	32	36	37	33	31	33	28	22	25	29	25		30	27	35	41	33	35	36	44	28	36	37	48	32	48	26	46	37	29	24	31

## Sheet:  Figure_4E
	Control	Celastrol
	-16.7358	-17.4744
	-17.8467	-21.9604
	-16.04	-25.0793
	-18.3105	-22.8149
	-16.9189	-16.095
	-18.5303	-19.2993
	-14.0991	-24.3408
	-20.5261	-27.8687
	-18.158	-18.3716
	-17.6575	-7.86
	-17.8223	-24.292
	-17.511	-19.873
	-17.7856	-17.0105
	-19.0369	-21.46
	-16.0034	-21.698
	-12.9639	-22.8394
	-18.7195	-18.512
	-17.6575	-23.2117
	-16.8884	-18.2434
	-28.9795	-21.8811
	-26.4404	-23.2666
	-17.3645	-25.2625
	-18.4692	-17.9321
		-19.8425
		-16.1194
		-19.9036
		-20.3796
		-19.7632

## Sheet:  Figure_4F
	Control	Celastrol
	-45.3213	-41.0854
	-37.9665	-43.9236
	-31.9546	-41.3662
	-42.886	-44.6255
	-46.9509	-50.082
	-42.1719	-39.0347
	-34.7561	-38.2656
	-41.4883	-46.6519
	-33.8101	-43.3865
	-38.6746	-51.9009
	-55.2029	-45.3945
	-43.8809	-42.947
	-47.7627	-43.3804
	-45.4739	-38.1008
	-33.2363	-42.239
	-49.783	-34.4692
	-51.7422	-50.1187
	-51.5286	-46.3467
	-49.8135	-45.5776
	-38.1863	-40.9817
	-38.4487	-41.4639
	-49.2336	-37.6614
	-42.5015	-43.9846
		-43.7222
		-51.7117
		-45.6082
		-48.2998
		-46.6152

## Sheet:  Figure_4G
	Control	Celastrol
	705.54	714.19
	669.14	710.195
	264.159	917.565
	922.695	768
	1047.94	1345.17
	1064.11	1048.51
	710.14	948.625
	610.535	755.375
	805.33	1011.62
	598.48	1869.16
	566.87	2028.5
	763.805	1087.55
	1270.95	736.465
	835.585	877.605
	728.21	1527.52
	495.852	641.295
	950.366	621.144
	884.805	813.294
	754.21	901.546
	791.344	649.99
	661.639	697.537
	649.838	504.186
	641.589	977.09
	512.555	786.865
	621.183	734.455
	591.53	946.02
	231.334	1133.47
		646.97

## Sheet:  Figure_4H
	Control	Celastrol
	8	2
	7	3
	10	5
	6	7
	10	6
	5	10
	8	7
	8	4
	12
	12

## Sheet:  Figure_4I
	Control	Celastrol
	1.41	1.55
	1.36	1.23
	1.73	1.62
	1.8	1.39
	2.02	1.05
	1.66	1.56
	1.91	1.67
	1.45	1.58
	1.8
	1.94

## Sheet:  Figure_4J
	Control	Celastrol
	6.5	7.8
	7	7.2
	6.8	7.4
	7.8	8.3
	7.3	7.2
	6.3	8
	7.4	7.3
	8	7.6
	6.9
	7.2

## Sheet:  Figure_4K
	Control	Celastrol		(x1000)
	6.43345	3.89595
	5.35224	4.48492
	5.34293	3.93553
	4.79401	3.89732
	5.82435	4.78683

## Sheet:  Figure_4L
	Control	Celastrol		(x100)
	0.833381	2.848
	1.46013	5.72527
	1.15191	3.97727
	1.78695	4.75529
	1.5853	5.11659
