# Supplementary material for: Stimulation of hypothalamic oxytocin neurons suppresses colorectal cancer progression in mice
Source: eLife. 2021 Sep 16;10:e67535. doi: 10.7554/eLife.67535 (PMC8536257; doi:10.7554/eLife.67535)
Supplement: Figure 5—source data 1. [file elife-67535-fig5-data1.xlsx]

## Sheet:  Figure_5E
	OxtCre		OxtCre;DTA
	Control	Celastrol	Control	Celastrol
	7	4	8	12
	6	5	10	8
	7	2	8	11
	8	3	15	9
	8	5	15	7
	6	5	11	13
	7	4
		4

## Sheet:  Figure_5F
	OxtCre		OxtCre;DTA
	Control	Celastrol	Control	Celastrol
	1.61	1.35	1.9	1.68
	1.62	1.18	1.68	1.56
	1.67	1.5	1.78	2.19
	1.64	1.43	2.23	1.53
	1.58	1.38	2.21	1.74
	1.5	1.5	2.16	1.77
	2.04	1.4
		1.28

## Sheet:  Figure_5G
	OxtCre		OxtCre;DTA
	Control	Celastrol	Control	Celastrol
	8.5	8.3	8	6.7
	7.9	7.4	7.5	7.4
	8.4	8.9	8.8	7.7
	6.3	8.3	4.5	6.6
	7.4	8.5	7.2	9.8
	8.7	8	7.6	7.2
	6.8	7.9
		8.2

## Sheet:  Figure_5I
	OxtCre		OxtCre;DTA
	Control	Celastrol	Control	Celastrol		(x1000)
	4.91899	3.77646	5.99726	6.02789
	4.99123	3.10358	6.69493	6.91359
	6.05198	2.97022	6.83261	5.99281
	5.0724	3.13784	6.58853	5.99018
			7.35673	5.67971

## Sheet:  Figure_5K
	OxtCre		OxtCre;DTA
	Control	Celastrol	Control	Celastrol		(x100)
	1.355	4.5545	0.442185	1.28422
	1.85085	5.16653	0.620985	0.665302
	1.52143	4.23709	0.482524	1.00905
	1.37192	3.58399	0.90076	1.3337
