# Supplementary material for: Stimulation of hypothalamic oxytocin neurons suppresses colorectal cancer progression in mice
Source: eLife. 2021 Sep 16;10:e67535. doi: 10.7554/eLife.67535 (PMC8536257; doi:10.7554/eLife.67535)
Supplement: Figure 6—source data 1. [file elife-67535-fig6-data1.xlsx]

## Sheet:  Figure_6B
	Saline		ISO
	Control	hM3Dq	Control	hM3Dq
	4.65116	85.7143	8.82353	86.2069
	4.54545	92.3077	5.55556	91.6667
	4.44444	91.6667	6.06061	88.8889
	4.16667	88.8889	6.81818	91.3043
	7.40741	88	6.66667	95.8333
	10.3448	84	4.16667	89.6552
	11.1111

## Sheet:  Figure_6D
	Saline		ISO
	Control	hM3Dq	Control	hM3Dq
	7	5	9	9
	6	6	9	6
	8	4	10	10
	12	6	6	9
	9	3	8	7
	7	5	9	6
	10

## Sheet:  Figure_6E
	Saline		ISO
	Control	hM3Dq	Control	hM3Dq
	1.84	1.28	1.9	1.87
	1.67	1.68	2.16	1.67
	1.9	1.6	2.06	2.22
	2.15	1.45	1.65	2.06
	2.03	1.33	1.91	1.57
	1.7	1.56	1.84	1.72
	1.86

## Sheet:  Figure_6F
	Saline		ISO
	Control	hM3Dq	Control	hM3Dq
	7.5	8.2	9.1	8.9
	8.2	8	7.9	9.3
	7.4	8.6	8.2	8.4
	7.6	8.5	8.5	7.5
	8.2	7.9	8.1	8
	8.1	8.2	8	8.2
	8.9

## Sheet:  Figure_6H
	Saline		ISO
	Control	hM3Dq	Control	hM3Dq		(x1000)
	4.08842	2.63999	4.91799	3.465
	3.25288	3.15331	3.60241	4.08135
	3.81378	2.54206	5.54924	4.61031
	4.9555	1.8883	3.98892	3.41659
			4.22661	4.05398

## Sheet:  Figure_6J
	Saline		ISO
	Control	hM3Dq	Control	hM3Dq		(x100)
	0.926039	4.12781	1.54314	0.953106
	0.680946	2.63156	0.83835	1.44699
	1.08745	3.96405	1.11477	1.68612
	1.69241	3.33374	0.880705	1.29784
