# Supplementary material for: Stimulation of hypothalamic oxytocin neurons suppresses colorectal cancer progression in mice
Source: eLife. 2021 Sep 16;10:e67535. doi: 10.7554/eLife.67535 (PMC8536257; doi:10.7554/eLife.67535)
Supplement: Figure 7—source data 1. [file elife-67535-fig7-data1.xlsx]

## Sheet:  Figure_7E
	Vehicle		OTR anta
	Control	Celastrol	Control	Celastrol
	0.84	0.141667	0.911667	0.695
	0.648333	0.126667	0.643333	0.523333
	0.791667	0.291667	0.545	0.381667
	0.525	0.101667	0.411667	0.29
	0.738333	0.323333	0.436667	0.345
	0.681667	0.268333	0.758333	0.818333
	0.526667	0.213333	0.68	0.493333
	0.811667	0.505	0.311667	0.258333
	0.628333	0.33	0.648333	0.623333
	0.5	0.21	0.526667	0.451667
	0.505	0.221667	0.33	0.236667
	1.05	0.773333	0.308333	0.28
	0.42	0.143333	0.54	0.491667
	0.731667	0.465	0.556667	0.53
	0.668333	0.401667	0.926667	0.943333
	0.491667	0.231667	0.741667	0.66
	0.495	0.25	0.423333	0.391667
	0.518333	0.278333	0.481667	0.478333
	0.505	0.27	0.351667	0.38
	0.693333	0.465	0.616667	0.585
	0.591667	0.365	1.11	1.08
	0.955	0.728333	0.598333	0.626667
	0.49	0.278333	0.54	0.578333
	0.53	0.326667	0.545	0.553333
	0.901667	0.701667	0.356667	0.373333
	0.753333	0.555	0.408333	0.45
	0.568333	0.371667	0.323333	0.378333
	0.8	0.65	0.706667	0.756667
	0.526667	0.38	0.631667	0.615
	0.505	0.375834	0.408333	0.343333
	0.746667	0.626667	0.268333	0.33
	0.456667	0.346667	0.64	0.675
	0.72	0.61	0.418333	0.433333
	0.516667	0.406667	0.443333	0.496667
	0.406667	0.296667	0.435	0.458333
	0.545	0.44	0.7	0.738333
	0.505	0.403333	0.741667	0.798333
	0.678333	0.576667	0.573333	0.536667
	0.3	0.2	0.4	0.531667
	0.268333	0.175	0.738333	0.823333
	0.581667	0.493333	0.4	0.576667
	0.301667	0.225	0.738333	0.81
	0.256667	0.205	0.665	0.731667
	0.395	0.351667	0.343333	0.69
	0.23	0.186667
	0.351667	0.316667
	0.408333	0.381667
	0.326667	0.303333
	0.375	0.351667
	0.233333	0.221667
	0.336667	0.328333
	0.263333	0.258333
	0.286667	0.286667
	0.476667	0.476667
	0.595	0.595
	0.438333	0.448333
	0.338333	0.406667
	0.5	0.576667
	0.761667	0.85
	0.448333	0.568333
	0.526667	0.656667
	0.553333	0.688333
	0.301667	0.446667
	0.383333	0.626667
	0.178333	0.423333
	0.386667	0.671667
	0.583333	0.921667
	0.336667	0.69

## Sheet:  Figure_7F
Control (Hz)	Celastrol (Hz)
	Decrease	No response	Increase
0.84	0.141667
0.648333	0.126667
0.791667	0.291667
0.525	0.101667
0.738333	0.323333
0.681667	0.268333
0.526667	0.213333
0.811667	0.505
0.628333	0.33
0.5	0.21
0.505	0.221667
1.05	0.773333
0.42	0.143333
0.731667	0.465
0.668333	0.401667
0.491667	0.231667
0.495	0.25
0.518333	0.278333
0.505	0.27
0.693333	0.465
0.591667	0.365
0.955	0.728333
0.49	0.278333
0.53	0.326667
0.901667	0.701667
0.753333	0.555
0.568333	0.371667
0.8	0.65
0.526667	0.38
0.505	0.375834
0.746667	0.626667
0.456667	0.346667
0.72	0.61
0.516667	0.406667
0.406667	0.296667
0.545	0.44
0.505	0.403333
0.678333	0.576667
0.3	0.2
0.268333	0.175
0.581667	0.493333
0.301667	0.225
0.256667	0.205
0.395		0.351667
0.23		0.186667
0.351667		0.316667
0.408333		0.381667
0.326667		0.303333
0.375		0.351667
0.233333		0.221667
0.336667		0.328333
0.263333		0.258333
0.286667		0.286667
0.476667		0.476667
0.595		0.595
0.438333		0.448333
0.338333			0.406667
0.5			0.576667
0.761667			0.85
0.448333			0.568333
0.526667			0.656667
0.553333			0.688333
0.301667			0.446667
0.383333			0.626667
0.178333			0.423333
0.386667			0.671667
0.583333			0.921667
0.336667			0.69
Decrease	0.6324
No response	0.1912
Increase	0.1765

## Sheet:  Figure_7G
Control (Hz)	Celastrol (Hz)
	Decrease	No response	Increase
0.911667	0.663333
0.643333	0.416667
0.545	0.335
0.411667	0.238333
0.436667	0.27
0.758333	0.596667
0.68	0.52
0.311667	0.263333
0.648333	0.603333
0.526667	0.481667
0.33	0.288333
0.308333		0.28
0.54		0.52
0.556667		0.541667
0.926667		0.911667
0.741667		0.73
0.423333		0.411667
0.481667		0.473333
0.351667		0.348333
0.616667		0.613333
1.11		1.10667
0.598333		0.595
0.54		0.536667
0.545		0.548333
0.356667		0.36
0.408333		0.411667
0.323333		0.326667
0.706667		0.713333
0.631667		0.64
0.408333		0.426667
0.268333		0.29
0.64		0.665
0.418333		0.446667
0.443333		0.473333
0.435		0.468333
0.7		0.733333
0.741667			0.785
0.573333			0.65
0.4			0.546667
0.738333			0.911667
0.4			0.583333
0.738333			0.936667
0.665			0.896667
0.343333			0.675
Decrease	0.25
No response	0.5682
Increase	0.18181

## Sheet:  Figure_7H
	Saline		ISO
	Control	Celastrol	Control	Celastrol
	7	4	7	6
	9	4	8	5
	6	3	6	5
	7	5	10	7
	7	4	7	8
	7	2	7	7
	5	5	8	6
	6	5

## Sheet:  Figure_7I
	Saline		ISO
	Control	Celastrol	Control	Celastrol
	1.64	1.23	1.6	1.23
	1.94	1.23	1.5	1.72
	1.43	1.5	1.42	1.7
	1.71	1.24	1.94	1.76
	1.56	1.18	1.57	2.11
	1.63	1.4	1.44	1.43
	1.66	1.34	2.29	1.53
	1.6	1.24

## Sheet:  Figure_7J
	Saline		ISO
	Control	Celastrol	Control	Celastrol		(x1000)
	7.39921	3.21435	6.00315	5.99147
	5.10743	2.6578	7.67641	4.43843
	6.29744	3.38275	5.12938	5.62308
	4.56508	4.30915	6.6963	6.57478

## Sheet:  Figure_7K
	Saline		ISO
	Control	Celastrol	Control	Celastrol		(x100)
	1.29681	4.94712	1.4832	1.02254
	1.05764	4.9385	0.795717	1.38833
	1.55271	4.57712	0.963755	1.71671
	1.68419	3.84637	1.14632	1.92799
